# Supplementary material for: Synthesis and characterization of [Pd2X2(μ-X)2{Ph2P(CH2CH2O)nCH2CH2PPh2-P,P′}]m(n = 3, 5, X = Cl, I) dimetallacrown ethers and the related dinuclear [Pd2Cl2(μ-Cl)2{Ph2P(CH2)12PPh2-P,P′}]mand [Pd2X2(μ-X2){Ph2P(CH2CH2O)2CH2CH3-P)2}] (X = Cl, I) complexes
Source: Royal Society of Chemistry journal article supplement (doi:10.1039/b303584k), 2003-01-01
Supplement: 207336.pdf [file 207336.pdf]

Supplementary Material (ESI) for Dalton Transactions  
This journal is © The Royal Society of Chemistry 2003

STRUCTURE DETERMINATION SUMMARY

Crystal Data for 207336

|                        |                                                        |
|------------------------|--------------------------------------------------------|
| Empirical Formula      | C32 H36 I4 O3 P2 Pd2                                   |
| Crystal System         | Orthorhombic                                           |
| Space Group            | Pnma                                                   |
| Unit Cell Dimensions   | a = 16.594(3) Å<br>b = 24.734(3) Å<br>c = 9.3914(10) Å |
| Volume                 | 3855(2) Å <sup>3</sup>                                 |
| Z                      | 4                                                      |
| Formula weight         | 1250.9                                                 |
| Density(calc.)         | 2.156 Mg/m <sup>3</sup>                                |
| Absorption Coefficient | 4.249 mm <sup>-1</sup>                                 |
| F(000)                 | 2344                                                   |

Data Collection

|                         |                                        |
|-------------------------|----------------------------------------|
| Diffractometer Used     | Enraf Nonius CAD4                      |
| Radiation               | MoK <sub>α</sub> (λ = 0.71073 Å)       |
| Temperature (K)         | 298                                    |
| Monochromator           | Highly oriented graphite crystal       |
| θ Range                 | 5.0 to 45.0°                           |
| Index Ranges            | -17 < h < 17, -26 < k < 26, 0 < l < 10 |
| Reflections Collected   | 9809                                   |
| Independent Reflections | 2580 (R <sub>int</sub> = 1.88%)        |
| Observed Reflections    | 2580 (F > 0.3σ(F))                     |
| Absorption Correction   | Semi-empirical                         |
| Min./Max. Transmission  | 0.1801 / 0.3071                        |

Solution and Refinement

|                              |                                                             |
|------------------------------|-------------------------------------------------------------|
| System Used                  | Siemens SHELXTL PLUS (PC Version)                           |
| Solution                     | Direct Methods                                              |
| Refinement Method            | Full-Matrix Least-Squares                                   |
| Refinement on                | F <sup>2</sup>                                              |
| Absolute Structure           | N/A                                                         |
| Extinction Coefficient       | 0.000106(15)                                                |
| Hydrogen Atoms               | Riding model, fixed isotropic U                             |
| Weighting Scheme             | w <sup>-1</sup> = σ <sup>2</sup> (F) + 0.0008F <sup>2</sup> |
| Number of Parameters Refined | 200                                                         |
| Final R Indices (obs. data)  | R = 4.52 %, wR = 5.24 %                                     |
| R Indices (all data)         | R = 4.52 %, wR = 5.24 %                                     |
| Goodness-of-Fit              | 1.29                                                        |
| Largest and Mean shift/error | 0.000, 0.000                                                |
| Data-to-Parameter Ratio      | 12.9:1                                                      |
| Largest Difference Peak      | 1.17 eÅ <sup>-3</sup>                                       |
| Largest Difference Hole      | -0.82 eÅ <sup>-3</sup>                                      |

Table 1. Atomic coordinates ( $\times 10^4$ ) and equivalent isotropic displacement coefficients ( $\text{\AA}^2 \times 10^3$ )

|       | x        | y       | z         | U(eq)  |
|-------|----------|---------|-----------|--------|
| I(1)  | 173(1)   | 2500    | -1972(1)  | 69(1)  |
| I(2)  | 1301(1)  | 2500    | 1227(1)   | 51(1)  |
| I(3)  | 1126(1)  | 972(1)  | 1402(1)   | 60(1)  |
| Pd(1) | 636(1)   | 1718(1) | -345(1)   | 38(1)  |
| P(1)  | 50(1)    | 1081(1) | -1726(2)  | 39(1)  |
| O(3)  | -1642(3) | 1364(3) | -234(6)   | 79(2)  |
| O(6)  | -2267(5) | 2500    | 439(13)   | 119(6) |
| C(1)  | -684(4)  | 666(3)  | -764(9)   | 58(3)  |
| C(2)  | -1192(4) | 943(4)  | 366(9)    | 67(3)  |
| C(4)  | -2254(9) | 1535(6) | 615(13)   | 146(7) |
| C(5)  | -2694(6) | 2009(6) | 25(14)    | 124(6) |
| C(11) | 752(4)   | 596(3)  | -2471(8)  | 45(2)  |
| C(12) | 458(5)   | 139(3)  | -3151(9)  | 58(3)  |
| C(13) | 989(5)   | -219(3) | -3807(10) | 68(3)  |
| C(14) | 1774(6)  | -157(4) | -3762(10) | 77(4)  |
| C(15) | 2076(5)  | 277(5)  | -3046(12) | 96(5)  |
| C(16) | 1558(5)  | 665(4)  | -2434(10) | 76(4)  |
| C(21) | -436(4)  | 1339(3) | -3333(8)  | 44(2)  |
| C(22) | -1277(5) | 1429(4) | -3393(9)  | 62(3)  |
| C(23) | -1589(6) | 1646(4) | -4614(12) | 81(4)  |
| C(24) | -1103(9) | 1788(4) | -5770(12) | 93(5)  |
| C(25) | -304(7)  | 1706(3) | -5670(10) | 73(4)  |
| C(26) | 36(5)    | 1473(3) | -4476(8)  | 57(3)  |

\* Equivalent isotropic U defined as one third of the trace of the orthogonalized  $U_{ij}$  tensor

Supplementary Material (ESI) for Dalton Transactions  
This journal is © The Royal Society of Chemistry 2003

Table 2. Bond lengths (Å)

|               |       |      |
|---------------|-------|------|
| I (1)–Pd (1)  | 2.582 | (1)  |
| I (1)–Pd (1A) | 2.582 | (1)  |
| I (2)–Pd (1)  | 2.672 | (1)  |
| I (2)–Pd (1A) | 2.672 | (1)  |
| I (3)–Pd (1)  | 2.600 | (1)  |
| Pd (1)–P (1)  | 2.260 | (2)  |
| P (1)–C (1)   | 1.832 | (8)  |
| P (1)–C (11)  | 1.813 | (7)  |
| P (1)–C (21)  | 1.826 | (7)  |
| O (3)–C (2)   | 1.399 | (11) |
| O (3)–C (4)   | 1.359 | (15) |
| O (6)–C (5)   | 1.459 | (14) |
| O (6)–C (5A)  | 1.459 | (14) |
| C (1)–C (2)   | 1.520 | (12) |
| C (4)–C (5)   | 1.488 | (20) |
| C (11)–C (12) | 1.387 | (10) |
| C (11)–C (16) | 1.349 | (10) |
| C (12)–C (13) | 1.393 | (12) |
| C (13)–C (14) | 1.312 | (13) |
| C (14)–C (15) | 1.363 | (15) |
| C (15)–C (16) | 1.410 | (14) |
| C (21)–C (22) | 1.415 | (10) |
| C (21)–C (26) | 1.369 | (11) |
| C (22)–C (23) | 1.368 | (14) |
| C (23)–C (24) | 1.397 | (16) |
| C (24)–C (25) | 1.345 | (18) |
| C (25)–C (26) | 1.382 | (12) |

Supplementary Material (ESI) for Dalton Transactions  
This journal is © The Royal Society of Chemistry 2003

Table 3. Bond angles (°)

|                   |           |
|-------------------|-----------|
| Pd(1)-I(1)-Pd(1A) | 97.0(1)   |
| Pd(1)-I(2)-Pd(1A) | 92.8(1)   |
| I(1)-Pd(1)-I(2)   | 84.7(1)   |
| I(1)-Pd(1)-I(3)   | 176.7(1)  |
| I(2)-Pd(1)-I(3)   | 92.1(1)   |
| I(1)-Pd(1)-P(1)   | 93.1(1)   |
| I(2)-Pd(1)-P(1)   | 177.8(1)  |
| I(3)-Pd(1)-P(1)   | 90.1(1)   |
| Pd(1)-P(1)-C(1)   | 113.2(3)  |
| Pd(1)-P(1)-C(11)  | 114.0(2)  |
| C(1)-P(1)-C(11)   | 104.2(3)  |
| Pd(1)-P(1)-C(21)  | 114.9(2)  |
| C(1)-P(1)-C(21)   | 108.1(3)  |
| C(11)-P(1)-C(21)  | 101.3(3)  |
| C(2)-O(3)-C(4)    | 113.2(8)  |
| C(5)-O(6)-C(5A)   | 112.8(11) |
| P(1)-C(1)-C(2)    | 117.4(6)  |
| O(3)-C(2)-C(1)    | 110.5(7)  |
| O(3)-C(4)-C(5)    | 113.1(10) |
| O(6)-C(5)-C(4)    | 108.6(10) |
| P(1)-C(11)-C(12)  | 119.4(5)  |
| P(1)-C(11)-C(16)  | 123.0(6)  |
| C(12)-C(11)-C(16) | 117.6(7)  |
| C(11)-C(12)-C(13) | 119.9(7)  |
| C(12)-C(13)-C(14) | 122.7(8)  |
| C(13)-C(14)-C(15) | 118.2(9)  |
| C(14)-C(15)-C(16) | 120.8(8)  |
| C(11)-C(16)-C(15) | 120.6(8)  |
| P(1)-C(21)-C(22)  | 121.6(6)  |
| P(1)-C(21)-C(26)  | 118.7(6)  |
| C(22)-C(21)-C(26) | 119.7(7)  |
| C(21)-C(22)-C(23) | 118.0(8)  |
| C(22)-C(23)-C(24) | 122.1(10) |
| C(23)-C(24)-C(25) | 118.5(10) |
| C(24)-C(25)-C(26) | 121.5(10) |
| C(21)-C(26)-C(25) | 120.2(8)  |

Supplementary Material (ESI) for Dalton Transactions  
 This journal is © The Royal Society of Chemistry 2003

Table 4. Anisotropic displacement coefficients ( $\text{\AA}^2 \times 10^3$ )

|        | U11      | U22      | U33      | U12     | U13     | U23      |
|--------|----------|----------|----------|---------|---------|----------|
| I (1)  | 120 (1)  | 27 (1)   | 61 (1)   | 0       | -42 (1) | 0        |
| I (2)  | 67 (1)   | 35 (1)   | 51 (1)   | 0       | -19 (1) | 0        |
| I (3)  | 67 (1)   | 42 (1)   | 73 (1)   | 4 (1)   | -18 (1) | 15 (1)   |
| Pd (1) | 44 (1)   | 26 (1)   | 44 (1)   | 2 (1)   | -5 (1)  | 1 (1)    |
| P (1)  | 40 (1)   | 27 (1)   | 51 (1)   | -1 (1)  | -2 (1)  | -2 (1)   |
| O (3)  | 64 (3)   | 107 (5)  | 67 (4)   | 29 (4)  | 19 (3)  | 11 (4)   |
| O (6)  | 48 (5)   | 185 (13) | 125 (10) | 0       | -11 (6) | 0        |
| C (1)  | 57 (5)   | 48 (5)   | 70 (5)   | -8 (4)  | 0 (4)   | 9 (4)    |
| C (2)  | 57 (5)   | 81 (6)   | 64 (6)   | 5 (4)   | 5 (4)   | 16 (5)   |
| C (4)  | 140 (11) | 223 (17) | 74 (8)   | 92 (11) | 7 (8)   | -25 (10) |
| C (5)  | 85 (8)   | 175 (14) | 112 (9)  | 26 (9)  | -9 (7)  | -62 (10) |
| C (11) | 39 (4)   | 38 (4)   | 56 (5)   | 3 (3)   | 1 (3)   | -4 (4)   |
| C (12) | 59 (4)   | 42 (5)   | 73 (5)   | 7 (4)   | -13 (4) | -13 (4)  |
| C (13) | 93 (7)   | 36 (5)   | 76 (6)   | 12 (4)  | -12 (5) | -20 (4)  |
| C (14) | 68 (6)   | 71 (7)   | 92 (7)   | 15 (5)  | 18 (5)  | -35 (6)  |
| C (15) | 50 (5)   | 112 (9)  | 125 (9)  | 4 (5)   | 25 (6)  | -25 (8)  |
| C (16) | 52 (5)   | 65 (6)   | 111 (8)  | -22 (4) | 21 (5)  | -34 (6)  |
| C (21) | 58 (4)   | 29 (4)   | 45 (4)   | -1 (3)  | -8 (3)  | -9 (3)   |
| C (22) | 60 (5)   | 66 (6)   | 60 (5)   | 7 (4)   | -14 (4) | 7 (5)    |
| C (23) | 81 (6)   | 82 (7)   | 82 (7)   | 15 (5)  | -28 (6) | 9 (6)    |
| C (24) | 172 (12) | 44 (6)   | 65 (7)   | 2 (7)   | -45 (8) | 5 (5)    |
| C (25) | 108 (7)  | 58 (6)   | 54 (6)   | -13 (5) | 7 (6)   | 0 (5)    |
| C (26) | 75 (5)   | 36 (4)   | 60 (5)   | -11 (4) | -2 (4)  | 2 (4)    |

The anisotropic displacement exponent takes the form:  $-2\pi^2(h^2a^2U_{11} + \dots + 2hka*b*U_{12})$

Supplementary Material (ESI) for Dalton Transactions  
This journal is © The Royal Society of Chemistry 2003

Table 5. H-Atom coordinates ( $\times 10^4$ ) and isotropic displacement coefficients ( $\Delta^2 \times 10^3$ )

|       | X     | y    | z     | U   |
|-------|-------|------|-------|-----|
| H(1A) | -404  | 366  | -344  | 59  |
| H(1B) | -1053 | 520  | -1452 | 59  |
| H(2A) | -1545 | 686  | 809   | 67  |
| H(2B) | -839  | 1087 | 1082  | 67  |
| H(4A) | -2064 | 1620 | 1553  | 145 |
| H(4B) | -2630 | 1241 | 692   | 145 |
| H(5A) | -2704 | 1980 | -994  | 126 |
| H(5B) | -3239 | 2029 | 362   | 126 |
| H(12) | -112  | 75   | -3183 | 58  |
| H(13) | 769   | -529 | -4285 | 69  |
| H(14) | 2125  | -405 | -4246 | 77  |
| H(15) | 2649  | 316  | -2941 | 95  |
| H(16) | 1781  | 977  | -1971 | 76  |
| H(22) | -1615 | 1343 | -2596 | 62  |
| H(23) | -2160 | 1703 | -4684 | 81  |
| H(24) | -1340 | 1940 | -6613 | 93  |
| H(25) | 32    | 1816 | -6450 | 74  |
| H(26) | 604   | 1401 | -4444 | 57  |
