# Supplementary material for: Synthesis and characterization of [Pd2X2(μ-X)2{Ph2P(CH2CH2O)nCH2CH2PPh2-P,P′}]m(n = 3, 5, X = Cl, I) dimetallacrown ethers and the related dinuclear [Pd2Cl2(μ-Cl)2{Ph2P(CH2)12PPh2-P,P′}]mand [Pd2X2(μ-X2){Ph2P(CH2CH2O)2CH2CH3-P)2}] (X = Cl, I) complexes
Source: Royal Society of Chemistry journal article supplement (doi:10.1039/b303584k), 2003-01-01
Supplement: 211031.pdf [file 211031.pdf]

Supplementary Material (ESI) for Dalton Transactions  
This journal is © The Royal Society of Chemistry 2003

STRUCTURE DETERMINATION SUMMARY

Crystal Data for 211031

|                        |                                                                                |
|------------------------|--------------------------------------------------------------------------------|
| Empirical Formula      | C 36 H 46 I 4 O 4 P 2 Pd 2                                                     |
| Crystal System         | Monoclinic                                                                     |
| Space Group            | P2 <sub>1</sub> /n                                                             |
| Unit Cell Dimensions   | a = 10.5171(14) Å<br>b = 10.7549(12) Å<br>c = 19.5756(14) Å<br>β = 97.973(8) ° |
| Volume                 | 2192.8(11) Å <sup>3</sup>                                                      |
| Z                      | 2                                                                              |
| Formula weight         | 1325.1                                                                         |
| Density(calc.)         | 2.007 Mg/m <sup>3</sup>                                                        |
| Absorption Coefficient | 3.742 mm <sup>-1</sup>                                                         |
| F(000)                 | 1256                                                                           |

Data Collection

|                         |                                        |
|-------------------------|----------------------------------------|
| Diffractometer Used     | Enraf Nonius CAD4                      |
| Radiation               | MoK <sub>α</sub> (λ = 0.71073 Å)       |
| Temperature (K)         | 298                                    |
| Monochromator           | Highly oriented graphite crystal       |
| 2θ Range                | 2.0 to 45.0°                           |
| Index Ranges            | 0 < h < 11, -11 < k < 11, -21 < l < 20 |
| Reflections Collected   | 5898                                   |
| Independent Reflections | 2865 (R <sub>int</sub> = 2.68 %)       |
| Observed Reflections    | 2865 (F > 0.3σ(F))                     |
| Absorption Correction   | Semi-empirical                         |
| Min./Max. Transmission  | 0.0981/0.1623                          |

Solution and Refinement

|                              |                                                             |
|------------------------------|-------------------------------------------------------------|
| System Used                  | Siemens SHELXTL PLUS (PC Version)                           |
| Solution                     | Direct Methods                                              |
| Refinement Method            | Full-Matrix Least-Squares                                   |
| Refinement on                | F <sup>2</sup>                                              |
| Absolute Structure           | N/A                                                         |
| Extinction Coefficient       | 0.00013(2)                                                  |
| Hydrogen Atoms               | Riding model, fixed isotropic U                             |
| Weighting Scheme             | w <sup>-1</sup> = σ <sup>2</sup> (F) + 0.0005F <sup>2</sup> |
| Number of Parameters Refined | 218                                                         |
| Final R Indices (obs. data)  | R = 4.74 %, wR = 4.51 %                                     |
| R Indices (all data)         | R = 4.74 %, wR = 4.51 %                                     |
| Goodness-of-Fit              | 1.01                                                        |
| Largest and Mean shift/error | 0.000, 0.000                                                |
| Data-to-Parameter Ratio      | 13.1:1                                                      |
| Largest Difference Peak      | 0.93 eÅ <sup>-3</sup>                                       |
| Largest Difference Hole      | -0.92 eÅ <sup>-3</sup>                                      |

Supplementary Material (ESI) for Dalton Transactions  
This journal is © The Royal Society of Chemistry 2003

Table 1. Atomic coordinates ( $\times 10^4$ ) and equivalent isotropic displacement coefficients ( $\text{\AA}^2 \times 10^3$ )

|        | x          | y          | z        | U(eq)   |
|--------|------------|------------|----------|---------|
| I (1)  | 820 (1)    | 1441 (1)   | 93 (1)   | 64 (1)  |
| I (2)  | -677 (1)   | 2171 (1)   | 1677 (1) | 82 (1)  |
| Pd (1) | -739 (1)   | 281 (1)    | 845 (1)  | 49 (1)  |
| P (1)  | -2021 (2)  | -701 (2)   | 1505 (1) | 51 (1)  |
| O (1)  | 604 (4)    | -1597 (5)  | 2067 (3) | 69 (2)  |
| O (6)  | 2007 (6)   | -3405 (7)  | 1488 (3) | 98 (3)  |
| C (1)  | -1337 (7)  | -865 (8)   | 2423 (3) | 62 (3)  |
| C (2)  | 113 (7)    | -850 (8)   | 2563 (4) | 68 (3)  |
| C (4)  | 1960 (8)   | -1561 (8)  | 2123 (5) | 83 (4)  |
| C (5)  | 2378 (9)   | -2153 (9)  | 1513 (5) | 96 (4)  |
| C (7)  | 2155 (12)  | -3999 (11) | 875 (6)  | 122 (6) |
| C (8)  | 1821 (12)  | -5236 (10) | 866 (6)  | 125 (6) |
| C (11) | -3533 (7)  | 100 (7)    | 1500 (4) | 60 (3)  |
| C (12) | -4076 (9)  | 733 (10)   | 913 (5)  | 94 (4)  |
| C (13) | -5258 (9)  | 1296 (11)  | 887 (5)  | 109 (5) |
| C (14) | -5904 (9)  | 1279 (9)   | 1443 (6) | 88 (4)  |
| C (15) | -5361 (8)  | 677 (8)    | 2028 (5) | 76 (3)  |
| C (16) | -4204 (7)  | 99 (7)     | 2062 (4) | 63 (3)  |
| C (21) | -2517 (7)  | -2272 (7)  | 1243 (3) | 54 (2)  |
| C (22) | -3762 (8)  | -2564 (9)  | 984 (5)  | 82 (4)  |
| C (23) | -4092 (10) | -3772 (11) | 778 (5)  | 104 (5) |
| C (24) | -3209 (10) | -4702 (9)  | 847 (4)  | 86 (4)  |
| C (25) | -1971 (9)  | -4416 (8)  | 1092 (4) | 79 (4)  |
| C (26) | -1624 (8)  | -3239 (7)  | 1287 (4) | 64 (3)  |

\* Equivalent isotropic U defined as one third of the trace of the orthogonalized U<sub>ij</sub> tensor

Supplementary Material (ESI) for Dalton Transactions  
This journal is © The Royal Society of Chemistry 2003

Table 2. Bond lengths (Å)

|               |       |      |
|---------------|-------|------|
| I (1)–Pd (1)  | 2.661 | (1)  |
| I (1)–Pd (1A) | 2.601 | (1)  |
| I (2)–Pd (1)  | 2.601 | (1)  |
| Pd (1)–P (1)  | 2.256 | (2)  |
| Pd (1)–I (1A) | 2.601 | (1)  |
| P (1)–C (1)   | 1.849 | (6)  |
| P (1)–C (11)  | 1.807 | (7)  |
| P (1)–C (21)  | 1.821 | (7)  |
| O (1)–C (2)   | 1.412 | (10) |
| O (1)–C (4)   | 1.415 | (9)  |
| O (6)–C (5)   | 1.401 | (12) |
| O (6)–C (7)   | 1.387 | (14) |
| C (1)–C (2)   | 1.512 | (10) |
| C (4)–C (5)   | 1.473 | (14) |
| C (7)–C (8)   | 1.375 | (16) |
| C (11)–C (12) | 1.390 | (11) |
| C (11)–C (16) | 1.386 | (11) |
| C (12)–C (13) | 1.378 | (14) |
| C (13)–C (14) | 1.360 | (15) |
| C (14)–C (15) | 1.369 | (13) |
| C (15)–C (16) | 1.360 | (11) |
| C (21)–C (22) | 1.373 | (10) |
| C (21)–C (26) | 1.397 | (10) |
| C (22)–C (23) | 1.390 | (15) |
| C (23)–C (24) | 1.358 | (15) |
| C (24)–C (25) | 1.358 | (14) |
| C (25)–C (26) | 1.358 | (11) |

Supplementary Material (ESI) for Dalton Transactions  
This journal is © The Royal Society of Chemistry 2003

Table 3. Bond angles (E)

|                   |           |
|-------------------|-----------|
| Pd(1)-I(1)-Pd(1A) | 95.4(1)   |
| I(1)-Pd(1)-I(2)   | 90.9(1)   |
| I(1)-Pd(1)-P(1)   | 178.5(1)  |
| I(2)-Pd(1)-P(1)   | 88.4(1)   |
| I(1)-Pd(1)-I(1A)  | 84.6(1)   |
| I(2)-Pd(1)-I(1A)  | 174.0(1)  |
| P(1)-Pd(1)-I(1A)  | 96.2(1)   |
| Pd(1)-P(1)-C(1)   | 114.8(2)  |
| Pd(1)-P(1)-C(11)  | 111.7(3)  |
| C(1)-P(1)-C(11)   | 105.9(3)  |
| Pd(1)-P(1)-C(21)  | 116.3(2)  |
| C(1)-P(1)-C(21)   | 104.0(3)  |
| C(11)-P(1)-C(21)  | 102.9(3)  |
| C(2)-O(1)-C(4)    | 113.0(6)  |
| C(5)-O(6)-C(7)    | 114.2(8)  |
| P(1)-C(1)-C(2)    | 114.9(5)  |
| O(1)-C(2)-C(1)    | 109.0(6)  |
| O(1)-C(4)-C(5)    | 109.6(7)  |
| O(6)-C(5)-C(4)    | 109.4(8)  |
| O(6)-C(7)-C(8)    | 113.4(11) |
| P(1)-C(11)-C(12)  | 119.9(6)  |
| P(1)-C(11)-C(16)  | 122.7(5)  |
| C(12)-C(11)-C(16) | 117.5(7)  |
| C(11)-C(12)-C(13) | 120.7(9)  |
| C(12)-C(13)-C(14) | 120.9(9)  |
| C(13)-C(14)-C(15) | 118.6(9)  |
| C(14)-C(15)-C(16) | 121.5(9)  |
| C(11)-C(16)-C(15) | 120.8(7)  |
| P(1)-C(21)-C(22)  | 122.5(6)  |
| P(1)-C(21)-C(26)  | 120.6(5)  |
| C(22)-C(21)-C(26) | 116.8(7)  |
| C(21)-C(22)-C(23) | 120.6(8)  |
| C(22)-C(23)-C(24) | 121.3(9)  |
| C(23)-C(24)-C(25) | 118.5(9)  |
| C(24)-C(25)-C(26) | 121.1(8)  |
| C(21)-C(26)-C(25) | 121.7(7)  |

Supplementary Material (ESI) for Dalton Transactions  
 This journal is © The Royal Society of Chemistry 2003

Table 4. Anisotropic displacement coefficients ( $\Delta^2 \times 10^3$ )

|        | U11      | U22      | U33      | U12     | U13    | U23     |
|--------|----------|----------|----------|---------|--------|---------|
| I (1)  | 87 (1)   | 56 (1)   | 53 (1)   | -21 (1) | 27 (1) | -9 (1)  |
| I (2)  | 126 (1)  | 49 (1)   | 78 (1)   | -6 (1)  | 43 (1) | -14 (1) |
| Pd (1) | 64 (1)   | 43 (1)   | 44 (1)   | -2 (1)  | 17 (1) | 0 (1)   |
| P (1)  | 57 (1)   | 53 (1)   | 46 (1)   | 2 (1)   | 14 (1) | 2 (1)   |
| O (1)  | 57 (3)   | 73 (3)   | 78 (3)   | -7 (3)  | 15 (2) | -10 (3) |
| O (6)  | 98 (4)   | 104 (5)  | 94 (5)   | 2 (4)   | 17 (4) | -22 (4) |
| C (1)  | 75 (5)   | 70 (5)   | 39 (4)   | 0 (4)   | 5 (3)  | 5 (3)   |
| C (2)  | 65 (5)   | 67 (5)   | 69 (5)   | 2 (4)   | -4 (4) | 0 (4)   |
| C (4)  | 65 (5)   | 86 (6)   | 99 (7)   | -11 (4) | 16 (5) | -18 (5) |
| C (5)  | 82 (6)   | 96 (8)   | 112 (8)  | -10 (5) | 26 (6) | -13 (6) |
| C (7)  | 129 (9)  | 107 (9)  | 143 (11) | -7 (7)  | 65 (8) | -21 (8) |
| C (8)  | 150 (10) | 112 (9)  | 114 (9)  | -31 (8) | 27 (8) | -26 (7) |
| C (11) | 60 (4)   | 63 (5)   | 61 (5)   | 8 (4)   | 16 (4) | 6 (4)   |
| C (12) | 88 (6)   | 127 (8)  | 71 (6)   | 25 (6)  | 27 (5) | 13 (6)  |
| C (13) | 89 (7)   | 154 (11) | 83 (7)   | 47 (7)  | 4 (6)  | 28 (7)  |
| C (14) | 67 (5)   | 89 (7)   | 110 (8)  | 4 (5)   | 16 (6) | -17 (6) |
| C (15) | 62 (5)   | 82 (6)   | 86 (6)   | -8 (4)  | 20 (4) | -20 (5) |
| C (16) | 66 (5)   | 66 (5)   | 61 (5)   | 4 (4)   | 15 (4) | -1 (4)  |
| C (21) | 56 (4)   | 62 (4)   | 47 (4)   | -10 (4) | 18 (3) | 0 (3)   |
| C (22) | 65 (5)   | 90 (6)   | 90 (6)   | -8 (5)  | 10 (5) | -15 (5) |
| C (23) | 87 (7)   | 111 (9)  | 112 (8)  | -27 (6) | 10 (6) | -33 (7) |
| C (24) | 107 (7)  | 72 (6)   | 81 (6)   | -28 (6) | 22 (5) | -1 (5)  |
| C (25) | 108 (7)  | 55 (5)   | 77 (6)   | -10 (5) | 18 (5) | -3 (4)  |
| C (26) | 74 (5)   | 58 (5)   | 60 (5)   | -3 (4)  | 9 (4)  | 6 (4)   |

<sup>3</sup>The anisotropic displacement exponent takes the form:  
 $-2\pi^2 (h^2 a^2 U_{11} + \dots + 2hka^* b^* U_{12} )$

Supplementary Material (ESI) for Dalton Transactions  
This journal is © The Royal Society of Chemistry 2003

Table 5. H-Atom coordinates ( $\times 10^4$ ) and isotropic displacement coefficients ( $\Delta^2 \times 10^3$ )

|       | x     | y     | z    | U   |
|-------|-------|-------|------|-----|
| H(1A) | -1622 | -1643 | 2588 | 62  |
| H(1B) | -1675 | -213  | 2681 | 62  |
| H(2A) | 406   | -10   | 2524 | 68  |
| H(2B) | 414   | -1144 | 3020 | 68  |
| H(4A) | 2313  | -2049 | 2515 | 83  |
| H(4B) | 2271  | -724  | 2189 | 83  |
| H(5A) | 1940  | -1733 | 1116 | 95  |
| H(5B) | 3286  | -2069 | 1513 | 95  |
| H(7A) | 3025  | -3912 | 786  | 121 |
| H(7B) | 1605  | -3610 | 504  | 121 |
| H(8A) | 1927  | -5620 | 435  | 123 |
| H(8B) | 2379  | -5631 | 1232 | 123 |
| H(8C) | 946   | -5326 | 947  | 123 |
| H(12) | -3633 | 752   | 516  | 94  |
| H(13) | -5613 | 1738  | 479  | 110 |
| H(14) | -6745 | 1638  | 1416 | 88  |
| H(15) | -5796 | 690   | 2428 | 76  |
| H(16) | -3844 | -322  | 2476 | 64  |
| H(22) | -4395 | -1916 | 934  | 82  |
| H(23) | -4970 | -3950 | 600  | 104 |
| H(24) | -3455 | -5538 | 718  | 85  |
| H(25) | -1341 | -5067 | 1129 | 79  |
| H(26) | -745  | -3059 | 1463 | 65  |
